# Supplementary material for: Validation of a Machine Learning Expert Supporting System, ImmunoGenius, Using Immunohistochemistry Results of 3000 Patients with Lymphoid Neoplasms
Source: Diagnostics (Basel). 2023 Mar 31;13(7):1308. doi: 10.3390/diagnostics13071308 (PMC10093096; doi:10.3390/diagnostics13071308)
Supplement: Supplementary file 1 [file diagnostics-13-01308-s001.zip › diagnostics-2240536-Figure S1.pdf]

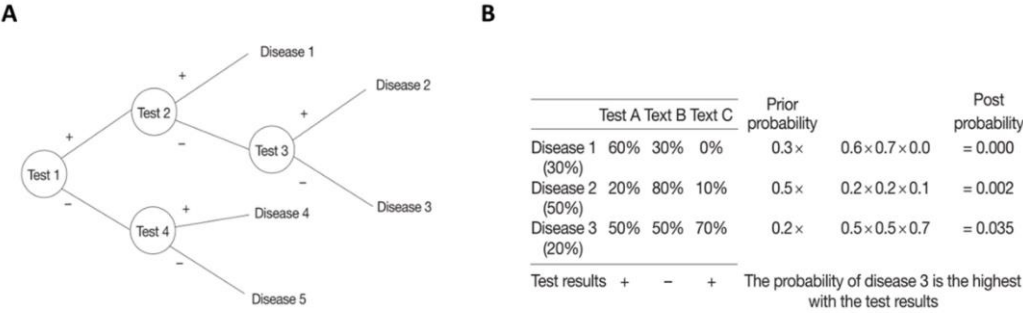

**Figure S1.** (A) Probabilistic decision tree for a machine-learning algorithm in diagnostic tests and diseases. (B) Prior and post probability based on Bayes' Theorem.
